# Supplementary material for: Subsequent Primary Malignancies in Patients with Nonmelanoma Skin Cancer in England: A National Record-Linkage Study
Source: Oxford University Press journal article supplement (doi:10.1158/1055-9965.epi-13-0902), 2014-03-01
Supplement: 10559965epi130902-sup-118765_1_supp_data_2191008_mv178k.docx [file 10559965epi130902-sup-118765_1_supp_data_2191008_mv178k.docx]

**Table S1: Analysis by sex: observed numbers of people with NMSC who had a subsequent record of primary malignant cancer, risk ratios (RR) and 95% confidence intervals**

|  |  | **Men** | |  | **Women** | |
| --- | --- | --- | --- | --- | --- | --- |
| **Cancer site (ICD–10 code)** |  | **O** | **RR (95% CI)** |  | **O** | **RR (95% CI)** |
| **Any malignant primary cancer excluding NMSC*** |  | **42636** | **1.34 (1.32-1.35)** |  | **24512** | **1.40 (1.38-1.42)** |
| **Any malignant primary cancer excluding all skin†** |  | **40012** | **1.26 (1.25-1.28)** |  | **22365** | **1.29 (1.27-1.31)** |
| **Bladder (C67)** |  | **4319** | **1.13 (1.09-1.16)** |  | **1053** | **1.15 (1.08-1.23)** |
| **Bone (C40–C41)** |  | **330** | **2.81 (2.47-3.18)** |  | **224** | **3.15 (2.70-3.65)** |
| **Brain (C71)** |  | **298** | **1.07 (0.95-1.21)** |  | **483** | **1.07 (0.97-1.18)** |
| **Breast (C50)** |  | **158** | **1.60 (1.34-1.91)** |  | **5996** | **1.24 (1.20-1.27)** |
| **Cervix (C53)** |  | **-** | **-** |  | **192** | **0.96 (0.83-1.12)** |
| **Colon (C18–C19)** |  | **4536** | **1.16 (1.12-1.19)** |  | **2723** | **1.17 (1.12-1.21)** |
| **GI – upper (C00–C06.8, C09–C10, C12–C14)** |  | **1278** | **2.19 (2.06-2.33)** |  | **696** | **2.74 (2.52-2.98)** |
| **Kidney (C64–C65)** |  | **1365** | **1.22 (1.15-1.29)** |  | **544** | **1.11 (1.01-1.21)** |
| **Larynx (C32)** |  | **551** | **1.29 (1.18-1.41)** |  | **98** | **1.53 (1.22-1.89)** |
| **Leukaemia – lymphoid (C91)** |  | **1500** | **2.14 (2.02-2.27)** |  | **596** | **1.79 (1.64-1.95)** |
| **Leukaemia – myeloid (C92)** |  | **810** | **1.37 (1.26-1.47)** |  | **363** | **1.14 (1.02-1.27)** |
| **Liver (C22)** |  | **763** | **1.15 (1.06-1.24)** |  | **332** | **1.01 (0.89-1.13)** |
| **Lung (C33–C34)** |  | **7456** | **1.32 (1.28-1.35)** |  | **3486** | **1.29 (1.25-1.34)** |
| **Lymphoma – Hodgkins (C81)** |  | **196** | **1.73 (1.48-2.01)** |  | **102** | **1.59 (1.28-1.95)** |
| **Lymphoma – non–Hodgkins (C82–C85)** |  | **2396** | **1.71 (1.63-1.79)** |  | **1236** | **1.52 (1.43-1.61)** |
| **Melanoma – malignant (C43)** |  | **3929** | **5.38 (5.16-5.60)** |  | **2764** | **5.95 (5.68-6.23)** |
| **Multiple myeloma (C90)** |  | **768** | **1.10 (1.02-1.19)** |  | **457** | **1.19 (1.08-1.31)** |
| **Nasopharynx (C11)** |  | **64** | **1.39 (1.06-1.81)** |  | **34** | **1.67 (1.13-2.39)** |
| **Nervous system – other (C70)** |  | **39** | **2.62 (1.77-3.79)** |  | **23** | **1.33 (0.82-2.05)** |
| **Oesophageal (C15)** |  | **1612** | **1.09 (1.03-1.14)** |  | **662** | **1.15 (1.06-1.25)** |
| **Ovary (C56)** |  | **-** | **-** |  | **898** | **1.08 (1.01-1.16)** |
| **Pancreas (C25)** |  | **1157** | **1.07 (1.00-1.13)** |  | **818** | **1.04 (0.96-1.11)** |
| **Prostate (C61)** |  | **11721** | **1.12 (1.10-1.14)** |  | **-** | **-** |
| **Rectum (C20–C21)** |  | **2215** | **1.31 (1.25-1.37)** |  | **1314** | **1.67 (1.57-1.77)** |
| **Salivary gland (C07–C08)** |  | **661** | **6.38 (5.71-7.13)** |  | **220** | **5.08 (4.31-5.97)** |
| **Stomach (C16)** |  | **1581** | **1.08 (1.02-1.14)** |  | **624** | **1.10 (1.01-1.20)** |
| **Testis (C62)** |  | **69** | **1.28 (0.99-1.63)** |  | **-** | **-** |
| **Thyroid (C73)** |  | **93** | **1.23 (0.98-1.52)** |  | **133** | **1.26 (1.05-1.51)** |
| **Uterus – body of (C54)** |  | **-** | **-** |  | **829** | **1.05 (0.98-1.13)** |

*** C00–C43, C45–C75, C81–C97 † C00–C41, C45–C75, C81–C97**
